# Supplementary material for: The cardiac microenvironment uses non‐canonical WNT signaling to activate monocytes after myocardial infarction
Source: PubMed Central journal article supplement (PMC5582413; doi:10.15252/emmm.201707565), 2017-08-03

# Figure 2A: Day 1

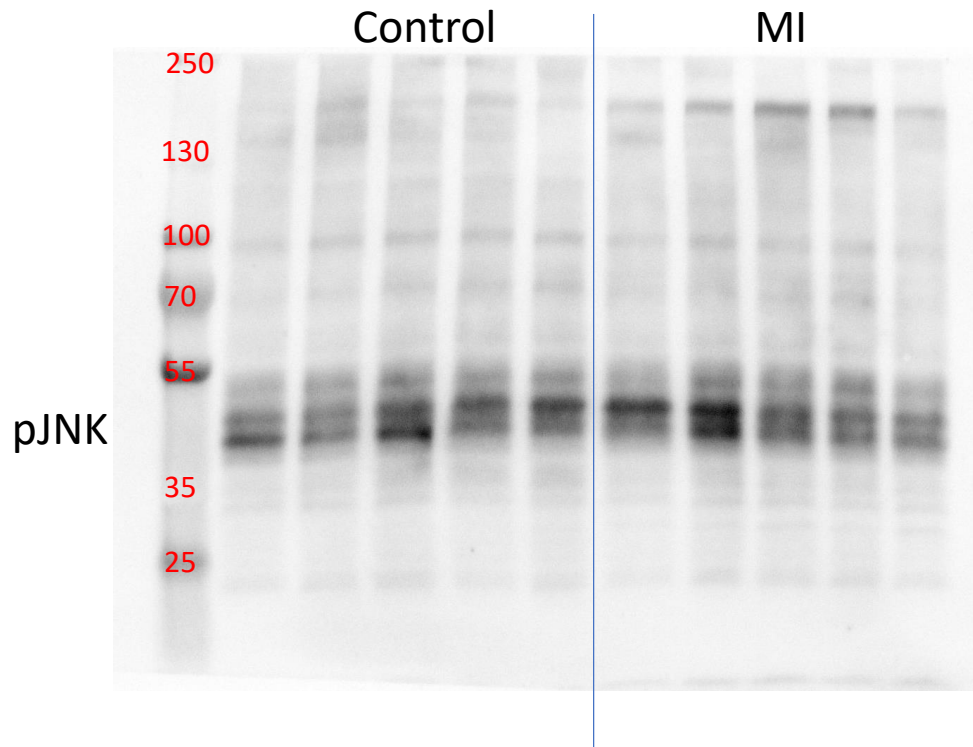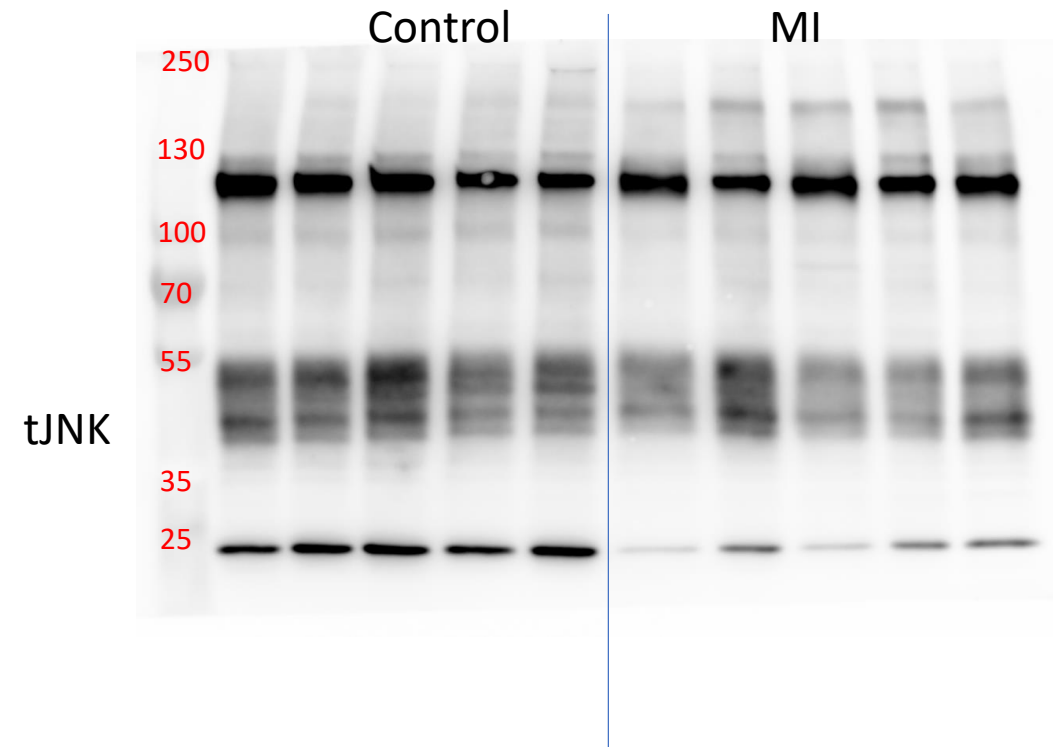

# Figure 2A: Day 2

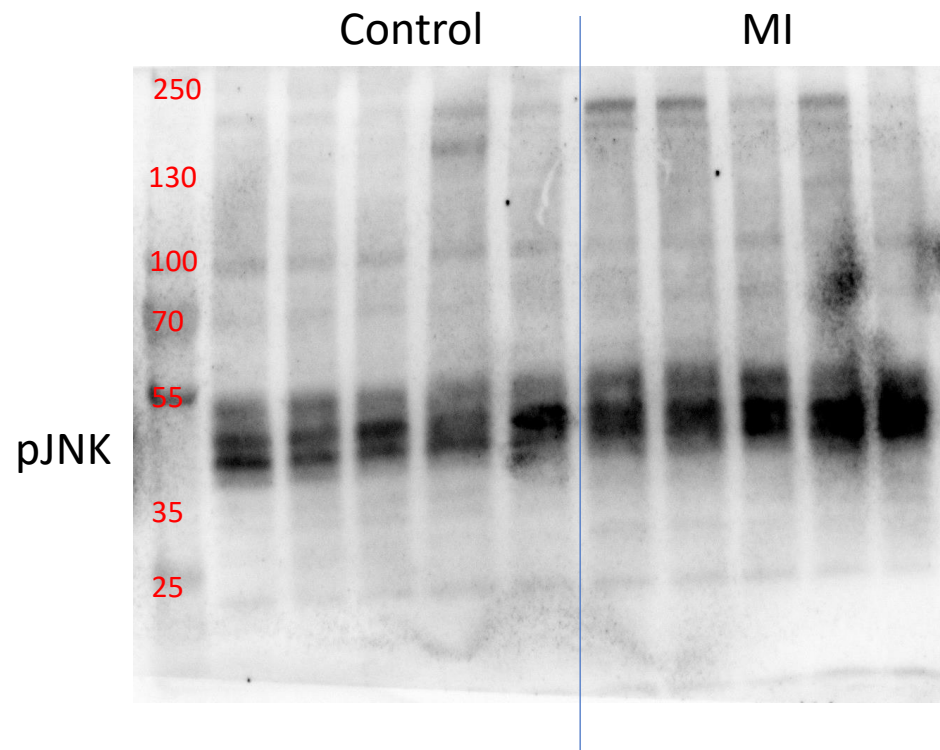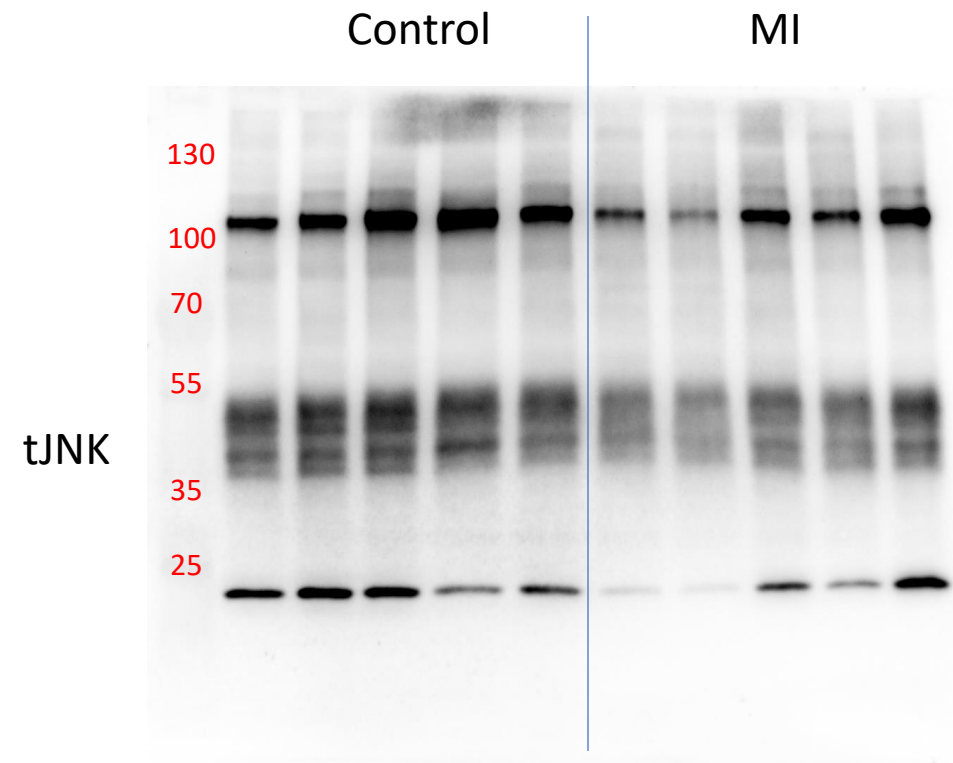

# Figure 2A: Day 2

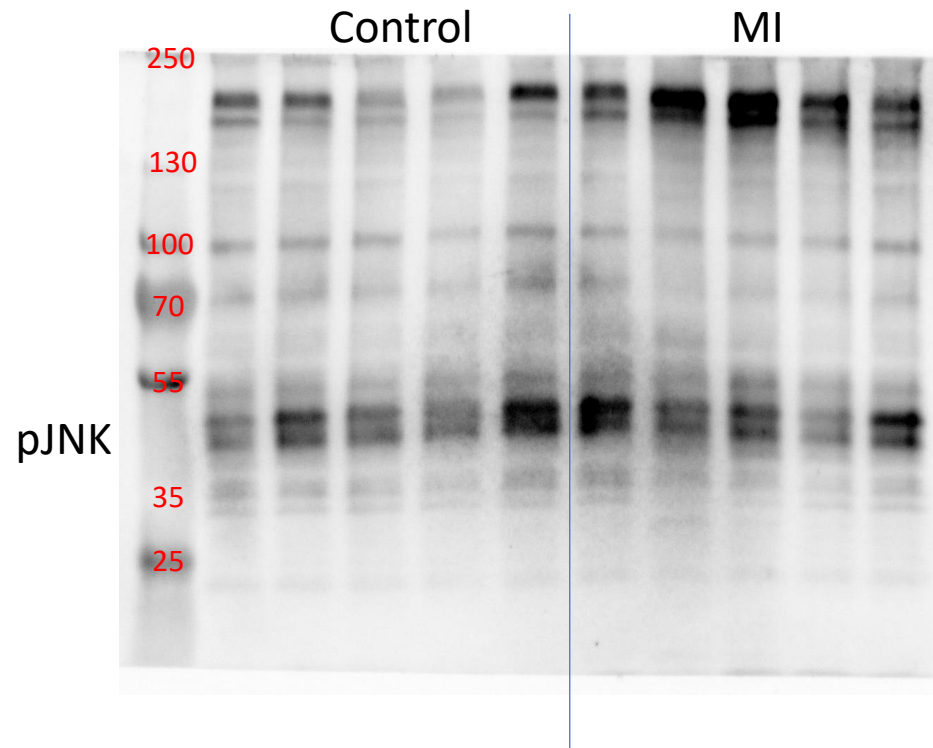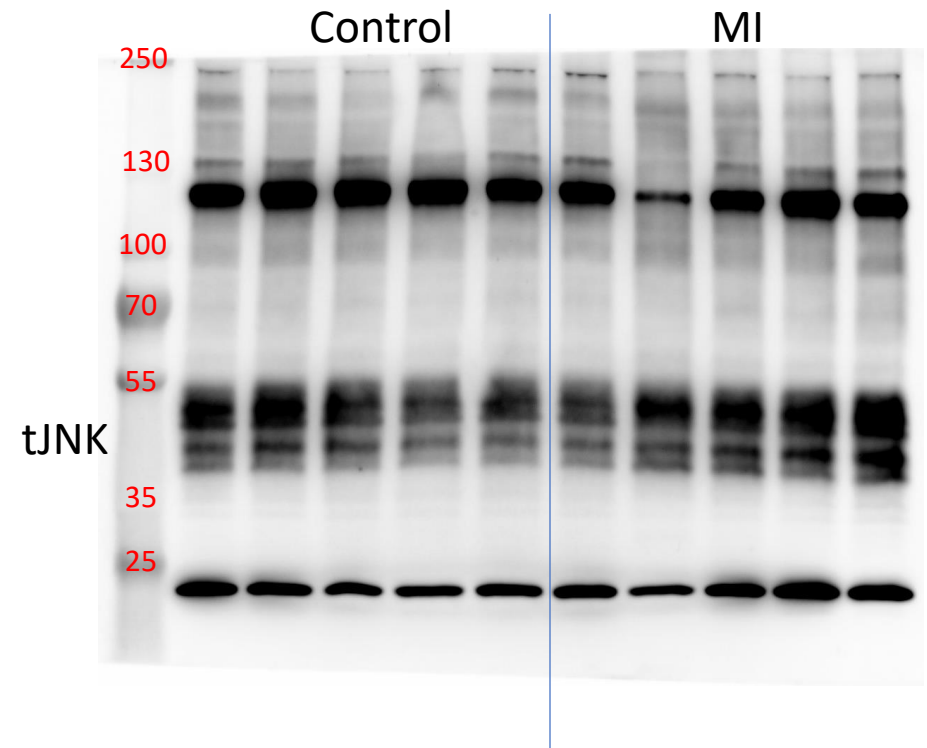

# Figure 2c

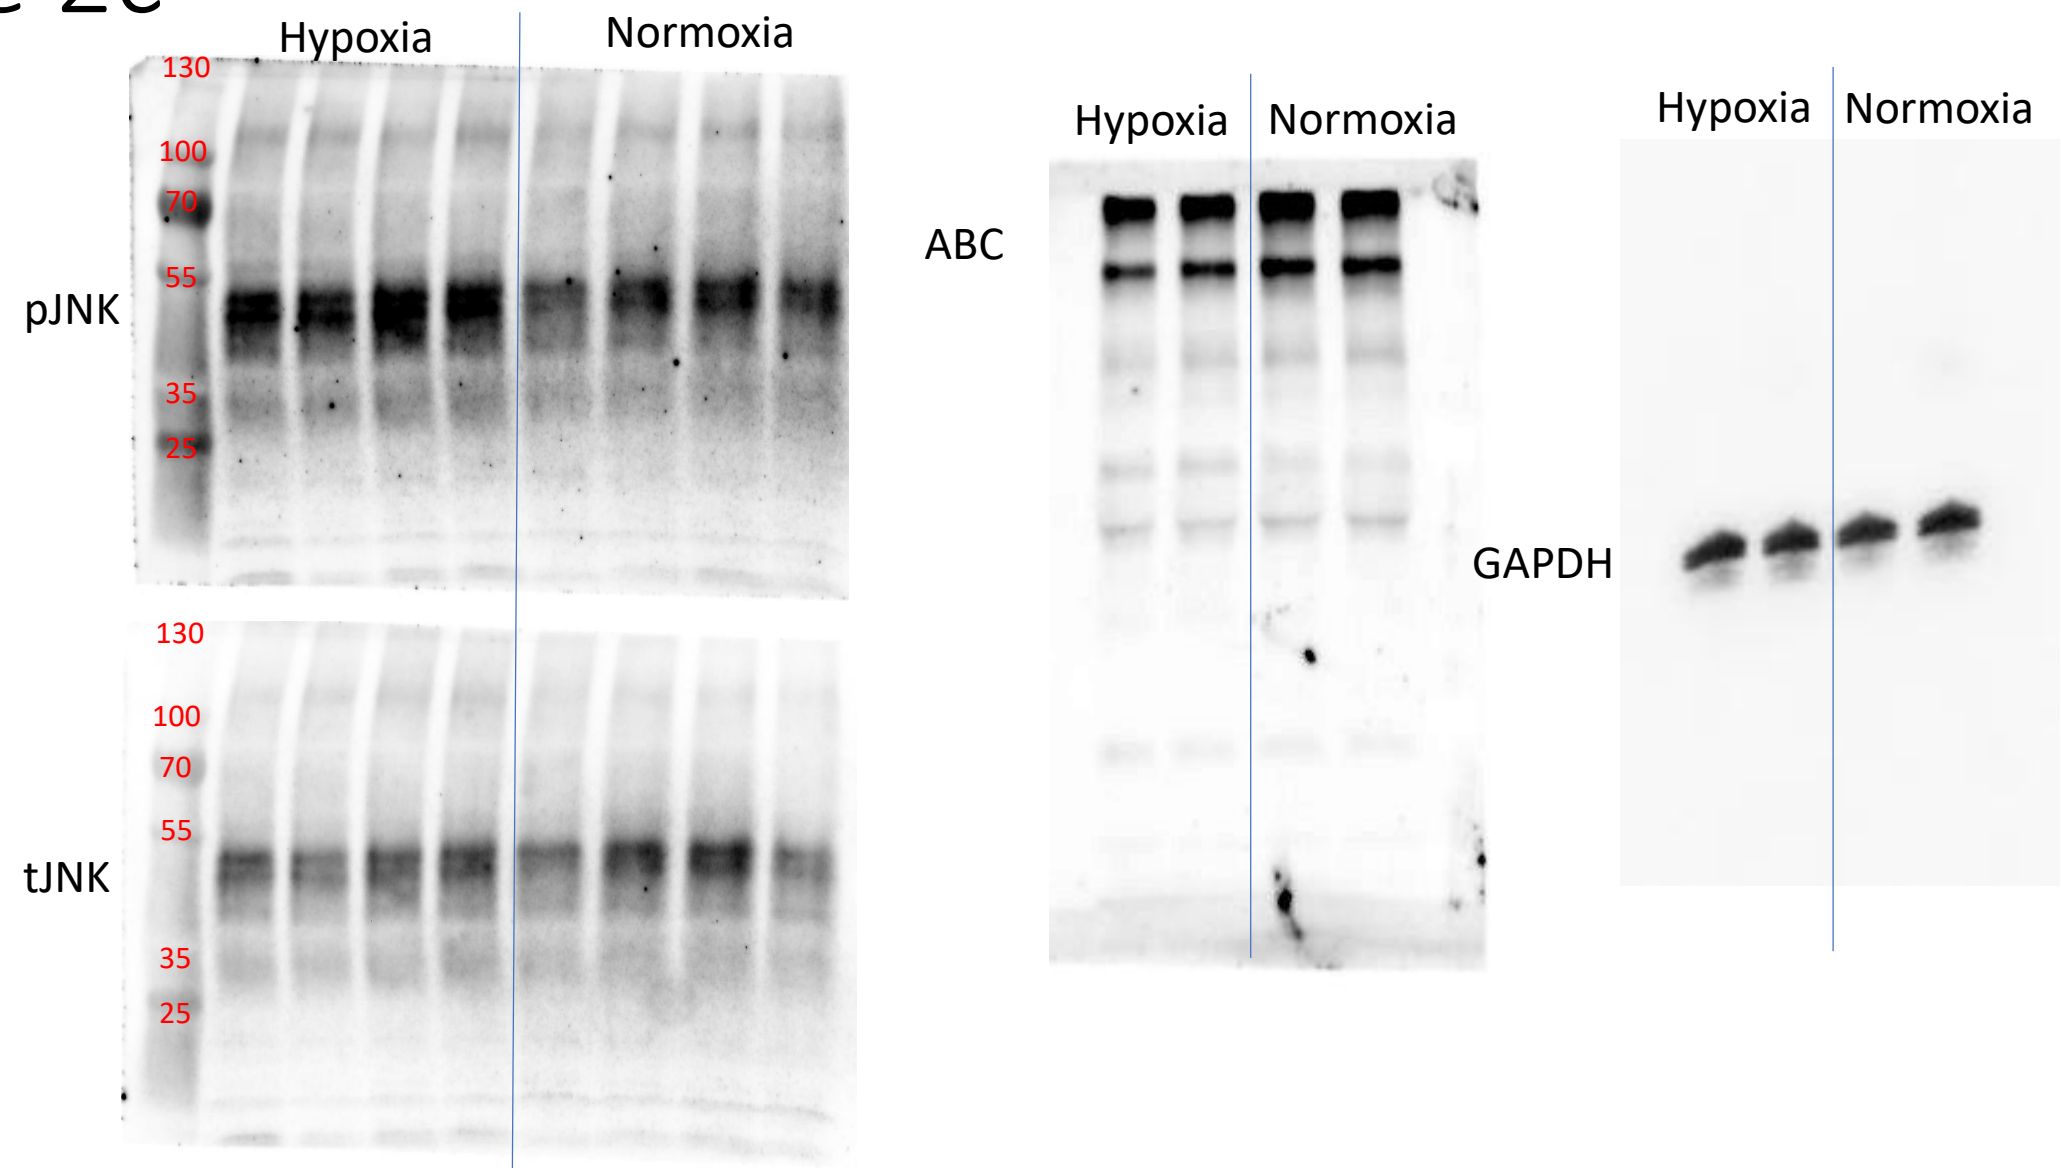

Supplement: EMMM-9-1279-s002.pdf [file EMMM-9-1279-s002.pdf]
